# Supplementary material for: Chronobiotics KL001 and KS15 Extend Lifespan and Modify Circadian Rhythms of Drosophila melanogaster
Source: Clocks Sleep. 2021 Aug 20;3(3):429–41. doi: 10.3390/clockssleep3030030 (PMC8395451; doi:10.3390/clockssleep3030030)
Supplement: Supplementary file 1 [file clockssleep-03-00030-s001.zip]

Archive with 5 entries (5 files):
- kl001female rawdata.txt
- kl001male rawdata.txt
- ks15 female rawdata.txt
- ks15 male rawdata.txt
- Supplementary file 1.pdf
