# Supplementary material for: Chronobiotics KL001 and KS15 Extend Lifespan and Modify Circadian Rhythms of Drosophila melanogaster
Source: Clocks Sleep. 2021 Aug 20;3(3):429–41. doi: 10.3390/clockssleep3030030 (PMC8395451; doi:10.3390/clockssleep3030030)
Supplement: Supplementary file 1 [file clockssleep-03-00030-s001.zip › ks15 female rawdata.txt]

Chronobiotics KL001 and KS15 extend lifespan and modify circadian rhythms of Drosophila melanogaster
I. A. Solovev1,2, M. V. Shaposhnikov1, A. Moskalev1
1Laboratory of Geroprotective and Radioprotective Technologies, Institute of Biology, Komi Science Centre, Ural Branch, Russian Academy of Sciences, Kommunisticheskaya St. 28, Syktyvkar, 167982, Russian Federation;
2Medical Institute of Pitirim Sorokin Syktyvkar State University, Oktyabrsky prosp. 55, Syktyvkar, 167001, Russian Federation
Corresponding author: A.A. Moskalev (amoskalev@ib.komisc.ru)
% WTnegativecontrolfem [134]
#days	dead	censored
1	0
2	0
3	0
4	0
5	3
6	0
7	0
8	0
9	0
10	0
11	0
12	0
13	0
14	0
15	0
16	0
17	0
18	0
19	0
20	0
21	0
22	1
23	0
24	0
25	0
26	0
27	1
28	0
29	0
30	0
31	0
32	0
33	0
34	0
35	1
36	1
37	0
38	0
39	0
40	2
41	4
42	1
43	0
44	0
45	0
46	0
47	0
48	1
49	0
50	1
51	2
52	0
53	0
54	1
55	0
56	6
57	0
58	12
59	0
60	0
61	1
62	4
63	0
64	7
65	2
66	0
67	0
68	7
69	4
70	4
71	0
72	17
73	0
74	0
75	18
76	5
77	0
78	0
79	22
80	0
81	0
82	6
% WTfcontrolks15 [151]
#days dead censored
1	0	0
2	0	0
3	0	0
4	0	0
5	0	0
6	0	0
7	7	0
8	2	0
9	2	0
10	1	0
11	1	0
12	0	0
13	0	0
14	1	0
15	0	0
16	2	0
17	2	0
18	2	0
19	0	0
20	0	0
21	6	0
22	3	0
23	0	0
24	2	0
25	5	0
26	0	0
27	0	0
28	11	0
29	4	0
30	0	0
31	4	0
32	0	0
33	6	0
34	0	0
35	1	0
36	0	0
37	9	0
38	1	0
39	3	0
40	0	0
41	0	0
42	13	0
43	7	0
44	0	0
45	3	0
46	3	0
47	5	0
48	0	0
49	14	0
50	2	0
51	0	0
52	4	0
53	7	0
54	0	0
55	0	0
56	3	0
57	2	0
58	0	0
59	1	0
60	1	0
61	0	0
62	0	0
63	0	0
64	2	0
65	0	0
66	0	0
67	6	0
68	0	0
69	0	0
70	0	0
71	0	0
72	3	0
73	0	0
% WTf1mcrmolks15 [148]
#days dead censored
1	0	0
2	0	0
3	0	0
4	0	0
5	0	0
6	0	0
7	4	0
8	3	0
9	2	0
10	1	0
11	3	0
12	0	0
13	0	0
14	1	0
15	1	0
16	0	0
17	1	0
18	2	0
19	0	0
20	0	0
21	3	0
22	4	0
23	0	0
24	6	0
25	5	0
26	0	0
27	0	0
28	8	0
29	0	0
30	0	0
31	0	0
32	0	0
33	7	0
34	0	0
35	3	0
36	0	0
37	9	0
38	2	0
39	2	0
40	0	0
41	0	0
42	9	0
43	1	0
44	2	0
45	7	0
46	10	0
47	0	0
48	0	0
49	11	0
50	1	0
51	0	0
52	2	0
53	7	0
54	0	0
55	0	0
56	7	0
57	6	0
58	0	0
59	2	0
60	2	0
61	0	0
62	0	0
63	0	0
64	3	0
65	0	0
66	0	0
67	7	0
68	0	0
69	0	0
70	0	0
71	0	0
72	4	0
% WTf5mcrmolks15 [161]
#days dead censored
1	0	0
2	0	0
3	0	0
4	0	0
5	0	0
6	0	0
7	4	0
8	4	0
9	0	0
10	1	0
11	0	0
12	0	0
13	0	0
14	0	0
15	1	0
16	0	0
17	0	0
18	2	0
19	0	0
20	0	0
21	4	0
22	3	0
23	0	0
24	2	0
25	9	0
26	0	0
27	0	0
28	7	0
29	5	0
30	1	0
31	3	0
32	0	0
33	10	0
34	0	0
35	1	0
36	0	0
37	8	0
38	3	0
39	6	0
40	0	0
41	0	0
42	26	0
43	10	0
44	3	0
45	11	0
46	10	0
47	0	0
48	0	0
49	9	0
50	7	0
51	0	0
52	0	0
53	2	0
54	0	0
55	0	0
56	3	0
57	1	0
58	0	0
59	0	0
60	3	0
61	0	0
62	0	0
63	0	0
64	2	0
65	0	0
66	0	0
67	0	0
68	0	0
69	0	0
70	0	0
71	0	0
72	0	0
73	0	0
74	0	0
75	0	0
76	0	0
77	0	0
78	0	0
79	0	0
80	0	0
81	0	0
% WTf10mcrmolks15 [155]
#days dead censored
1	0	0
2	0	0
3	0	0
4	0	0
5	0	0
6	0	0
7	3	0
8	2	0
9	0	0
10	0	0
11	1	0
12	0	0
13	0	0
14	0	0
15	1	0
16	0	0
17	0	0
18	0	0
19	0	0
20	0	0
21	2	0
22	4	0
23	0	0
24	0	0
25	3	0
26	0	0
27	0	0
28	7	0
29	2	0
30	1	0
31	3	0
32	0	0
33	7	0
34	0	0
35	4	0
36	3	0
37	12	0
38	5	0
39	1	0
40	0	0
41	0	0
42	15	0
43	7	0
44	8	0
45	7	0
46	10	0
47	3	0
48	0	0
49	9	0
50	3	0
51	0	0
52	4	0
53	1	0
54	0	0
55	0	0
56	0	0
57	4	0
58	0	0
59	0	0
60	2	0
61	0	0
62	0	0
63	0	0
64	6	0
65	0	0
66	0	0
67	11	0
68	0	0
69	0	0
70	0	0
71	0	0
72	3	0
73	0	0
74	0	0
75	0	0
76	0	0
77	0	0
78	0	0
79	0	0
80	0	0
81	1	0
